# Supplementary material for: A Double-Blind, Randomized, Placebo-Controlled Crossover Clinical Study of the Effects of Alpha-s1 Casein Hydrolysate on Sleep Disturbance
Source: PubMed Central journal article supplement (PMC6682925; doi:10.3390/nu11071466), 2019-06-27
Supplement: nutrients-11-01466-s001.pdf [file nutrients-11-01466-s001.pdf]

**Supplementary Table 1. The list of dairy products and high-tryptophan concentration foods that were restricted during the study.**

| <b>Category</b>                                     | <b>List of foods</b>                                             |
|-----------------------------------------------------|------------------------------------------------------------------|
| <b>Do not eat:</b>                                  |                                                                  |
| Dairy products                                      | Milk, Yogurt, Cheese                                             |
| Pork Tripe/Chitterlings                             | Grilled tripe, Tripe hotpot                                      |
| Beans and related products                          | Soybean, Tofu, Soy milk, Soy protein powder                      |
| Others                                              | Chi-seed, Spirulina                                              |
| <b>Limited (<math>\leq 100\text{g/day}</math>):</b> |                                                                  |
| Eggs                                                | 2 eggs, 10 quail eggs                                            |
| Poultry                                             | 1 chicken breast, 1 chicken leg, 10 smoked duck slices           |
| Meat                                                | Half portion of pork, 2 piece of tenderloin of lamb/veal         |
| Processed meat                                      | Half of spam, 10 small Vienna Sausages, 10 strips of bacon       |
| Nuts                                                | 1 cup of peanut, pumpkin seed, sunflower seed, sesame            |
| Fish                                                | 10 slices of smoked salmon, 1 piece of cod, 3/4 can of sea snail |

**Supplementary Table 2. Differences of change in sleep parameters measured by polysomnography (PSG) between control (Placebo) and test (Alpha-s1 casein hydrolysate (ACH)) phases.**

| Variables              | Placebo      |              | ACH          |              | <i>P-value</i> * |       |                |
|------------------------|--------------|--------------|--------------|--------------|------------------|-------|----------------|
|                        | Week 0       | Week 4       | Week 0       | Week 4       | Group            | Time  | Group*<br>Time |
| Time-in-bed (min)      | 393.4 ± 4.1  | 396.1 ± 5.3  | 393.0 ± 2.7  | 394.1 ± 4.4  | 0.718            | 0.613 | 0.841          |
| Total sleep time (min) | 326.5 ± 8.9  | 332.1 ± 8.1  | 330.6 ± 8.9  | 341.5 ± 9.0  | 0.352            | 0.286 | 0.729          |
| Sleep latency (min)    | 8.7 ± 1.7    | 8.1 ± 1.4    | 10.7 ± 2.5   | 6.5 ± 0.9    | 0.808            | 0.620 | 0.437          |
| Sleep efficiency (%)   | 83.0 ± 2.1   | 83.8 ± 1.7   | 84.0 ± 2.1   | 86.6 ± 1.9   | 0.183            | 0.324 | 0.599          |
| WASO (min)             | 58.2 ± 8.1   | 55.9 ± 5.9   | 51.8 ± 7.6   | 46.1 ± 7.3   | 0.040            | 0.567 | 0.551          |
| WASO (%)               | 15.1 ± 2.1   | 14.5 ± 1.6   | 13.6 ± 2.1   | 12.0 ± 1.9   | 0.055            | 0.530 | 0.545          |
| Total arousal (N)      | 78.7 ± 6.4   | 80.9 ± 6.6   | 73.6 ± 6.4   | 77.9 ± 7.2   | 0.352            | 0.453 | 0.812          |
| Arousal index (/hr)    | 15.0 ± 1.4   | 14.8 ± 1.2   | 13.7 ± 1.3   | 14.3 ± 1.5   | 0.196            | 0.841 | 0.665          |
| NREM/TST (%)           | 82.3 ± 1.2   | 80.5 ± 1.2   | 80.3 ± 1.2   | 78.0 ± 1.2   | 0.056            | 0.291 | 0.483          |
| Stage N1/TST (%)       | 16.9 ± 1.8   | 16.1 ± 1.2   | 15.9 ± 1.6   | 15.9 ± 1.6   | 0.366            | 0.826 | 0.917          |
| Stage N2/TST (%)       | 59.1 ± 2.1   | 57.8 ± 2.0   | 56.4 ± 2.9   | 60.9 ± 1.4   | 0.965            | 0.385 | 0.116          |
| SWS/TST (%)            | 6.3 ± 1.4    | 6.6 ± 1.4    | 5.4 ± 1.3    | 3.2 ± 0.9    | 0.046            | 0.258 | 0.156          |
| REM/TST (%)            | 17.7 ± 1.2   | 19.5 ± 1.2   | 19.8 ± 1.2   | 20.0 ± 1.2   | 0.042            | 0.314 | 0.440          |
| REM latency (min)      | 105.2 ± 13.5 | 111.1 ± 13.9 | 105.1 ± 12.9 | 108.7 ± 13.3 | 0.973            | 0.429 | 0.698          |
| AHI (/hr)              | 4.1 ± 1.7    | 3.8 ± 1.7    | 4.5 ± 1.7    | 3.8 ± 1.7    | 0.574            | 0.299 | 0.661          |

|                 |           |           |           |           |       |       |       |
|-----------------|-----------|-----------|-----------|-----------|-------|-------|-------|
| PLM index (/hr) | 7.6 ± 3.9 | 7.4 ± 3.9 | 8.0 ± 3.9 | 7.2 ± 3.9 | 0.915 | 0.501 | 0.749 |
|-----------------|-----------|-----------|-----------|-----------|-------|-------|-------|

---

Data are mean ± SE (standard error).

\*Linear mixed-effect model was used to analyze the effects of group, time and group\*time for 4 weeks.

WASO = wake after sleep onset, TST = total sleep time, NREM = non-rapid eye movement, SWS = slow wave sleep, REM = rapid eye movement, AHI = apnea-hypopnea index, PLM = periodic leg movement

**Supplementary Table 3. Analysis of vital signs and laboratory examinations at baseline (week 0) and after 4 weeks of placebo or ACH administration (week 4).**

| Variables                              |        | Placebo      | ACH          | <i>P-value</i> * |
|----------------------------------------|--------|--------------|--------------|------------------|
| Systolic blood pressure (mmHg)         | Week 0 | 113.9 ± 2.2  | 116.1 ± 2.1  | 0.453            |
|                                        | Week 4 | 112.2 ± 2.2  | 113.3 ± 2.2  | 0.723            |
| Diastolic blood pressure (mmHg)        | Week 0 | 72.8 ± 1.6   | 71.5 ± 1.7   | 0.574            |
|                                        | Week 4 | 73.0 ± 1.8   | 72.5 ± 1.5   | 0.838            |
| Pulse rate (beats/min)                 | Week 0 | 72.7 ± 1.6   | 69.2 ± 1.4   | 0.108            |
|                                        | Week 4 | 70.1 ± 1.3   | 71.7 ± 1.3   | 0.348            |
| Body temperature (°C)                  | Week 0 | 36.5 ± 0.0   | 36.4 ± 0.0   | 0.558            |
|                                        | Week 4 | 36.5 ± 0.0   | 36.5 ± 0.1   | 0.425            |
| White blood cell (10 <sup>3</sup> /μL) | Week 0 | 5.7 ± 0.3    | 5.6 ± 0.2    | 0.866            |
|                                        | Week 4 | 5.7 ± 0.3    | 5.6 ± 0.3    | 0.745            |
| Red blood cell (10 <sup>6</sup> /μL)   | Week 0 | 4.5 ± 0.1    | 4.5 ± 0.1    | 0.900            |
|                                        | Week 4 | 4.5 ± 0.1    | 4.4 ± 0.1    | 0.623            |
| Hemoglobin (g/dL)                      | Week 0 | 13.4 ± 0.2   | 13.5 ± 0.2   | 0.743            |
|                                        | Week 4 | 13.4 ± 0.2   | 13.4 ± 0.2   | 0.881            |
| Platelet (10 <sup>3</sup> /μL)         | Week 0 | 255.4 ± 8.2  | 257.8 ± 8.0  | 0.841            |
|                                        | Week 4 | 251.9 ± 8.2  | 258.8 ± 8.7  | 0.566            |
| Lymphocyte (%)                         | Week 0 | 37.3 ± 1.3   | 38.9 ± 1.1   | 0.337            |
|                                        | Week 4 | 38.5 ± 1.2   | 38.1 ± 1.2   | 0.805            |
| Monocyte (%)                           | Week 0 | 7.4 ± 0.3    | 6.8 ± 0.3    | 0.188            |
|                                        | Week 4 | 7.2 ± 0.3    | 7.2 ± 0.3    | 0.976            |
| AST (IU/L)                             | Week 0 | 26.3 ± 2.3   | 23.1 ± 0.8   | 0.261            |
|                                        | Week 4 | 23.0 ± 0.9   | 23.8 ± 1.2   | 0.654            |
| ALT (IU/L)                             | Week 0 | 24.3 ± 3.0   | 21.2 ± 1.7   | 0.467            |
|                                        | Week 4 | 20.5 ± 1.7   | 19.9 ± 1.1   | 0.883            |
| Triglyceride (mg/dL)                   | Week 0 | 100.5 ± 14.1 | 102.9 ± 11.8 | 0.893            |
|                                        | Week 4 | 96.7 ± 10.3  | 94.5 ± 8.9   | 0.871            |
| Total cholesterol (mg/dL)              | Week 0 | 182.9 ± 5.1  | 181.6 ± 4.1  | 0.852            |
|                                        | Week 4 | 183.7 ± 4.6  | 183.2 ± 5.3  | 0.946            |
| LDL-cholesterol (mg/dL)                | Week 0 | 113.0 ± 4.8  | 110.0 ± 3.8  | 0.632            |
|                                        | Week 4 | 111.1 ± 4.4  | 111.6 ± 4.6  | 0.940            |

Data are mean ± SE (standard error).

Student's t-test was used to compare the difference between the groups.
